# Supplementary material
Source: PubMed Central journal article supplement (PMC5824228)
Supplement: jamaoncol-3-69-s001.pdf [file jamaoncol-3-69-s001.pdf]

## Supplementary Online Content

Tomasello G, Petrelli F, Ghidini M, Russo A, Passalacqua R, Barni S. FOLFOXIRI plus bevacizumab as conversion therapy for patients with initially unresectable metastatic colorectal cancer: a systematic review and pooled analysis. *JAMA Oncol*. Published online May 25, 2017.  
doi:10.1001/jamaoncol.2017.0278

**eTable.** Characteristics of Included Studies and Efficacy of FOLFOXIRI-Bevacizumab

This supplementary material has been provided by the authors to give readers additional information about their work.

**eTable.** Characteristics of Included Studies and Efficacy of FOLFOXIRI-Bevacizumab

| Author/year      | Type of study/<br>median follow<br>up (months) | N° pts/<br>median<br>age<br>(years) | Treatment<br>arm                                  | Unresectable/LLD<br>(%) | Median<br>n°<br>cycles | ORR %<br>(n° events/n°<br>pts) | Median<br>OS<br>(months) | Median<br>PFS<br>(months) | Resection<br>rate %<br>(n°<br>events/n°<br>pts) | R0 %<br>(n°<br>events/n°<br>pts) | Quality of<br>evidence<br>(Jadad/NOS) |
|------------------|------------------------------------------------|-------------------------------------|---------------------------------------------------|-------------------------|------------------------|--------------------------------|--------------------------|---------------------------|-------------------------------------------------|----------------------------------|---------------------------------------|
| Bendell/2016     | Randomized<br>phase II/NR                      | 93*/57.5                            | FOLFOXIRI-<br>bevacizumab                         | 100/30                  | -                      | 72 (67/93)                     | -                        | 11.7                      | 15 (14/93)                                      | 15 (14/93)                       | 3                                     |
| Cheng/2015       | Retrospective/27                               | 69*/NR                              | **FOLFOXIRI-<br>bevacizumab                       | 100/37.6                | 11                     | 71 (49/69)                     | 31,3                     | 13,5                      | -                                               | 16 (11/69)                       | 6 (NOS)                               |
| Gruenberger/2015 | Randomized<br>phase II/NR                      | 41*/63                              | FOLFOXIRI-<br>bevacizumab                         | 100/100                 | -                      | 81 (33/41)                     | -                        | 18.6                      | 61 (25/41)                                      | 49 (20/41)                       | 3                                     |
| Ichikawa/2014    | Phase I-II/NR                                  | 16/NR                               | FOLFOXIRI-<br>bevacizumab                         | -/100                   | -                      | 51 (8/16)                      | -                        | -                         | 64.2 (9/16)                                     | 64.2<br>(9/16)                   | 5 (NOS)                               |
| Loupakis/2014    | Phase II/25.7                                  | 15/56                               | FOLFOXIRI-<br>bevacizumab                         | 100/46.6                | 10                     | 60 (9/15)                      | 24.1                     | 9.2                       | -                                               | 16 (1/7<br>with LLD<br>only)     | 7 (NOS)                               |
| Cremolini/2015   | Phase III/48.1                                 | 252*/60                             | FOLFOXIRI-<br>bevacizumab                         | 100/18                  | 11                     | 65.1<br>(164/252)              | 29.8                     | 12.3                      | -                                               | 15<br>(38/252)                   | 4                                     |
| Masi/2010        | Phase II/28.8                                  | 57/61                               | FOLFOXIRI-<br>bevacizumab                         | 100/53                  | 12                     | 77 (44/57)                     | 30.9                     | 10                        | 32 (18/32)                                      | 26 (15/57)                       | 8 (NOS)                               |
| Shimada/2015     | Retrospective/NR                               | 12/NR                               | NR                                                | 100/100                 | -                      | -                              | -                        | -                         | 64 (7/12)                                       | 64 (7/12)                        | 5 (NOS)                               |
| Stein/2015       | Prospective/15                                 | 97/58                               | FOLFOXIRI-<br>bevacizumab                         | 100/38.8                | 12                     | 65 (63/97)                     | 32.2                     | 11.1                      | 27 (26/97)                                      | 18 (17/97)                       | 7 (NOS)                               |
| Falcone/2016     | Randomized<br>phase II/25.7                    | 117*/61                             | FOLFOXIRI-<br>bevacizumab<br>→ bev<br>maintenance | 100/27                  | -                      | 68 (80/117)                    | -                        | 9.5                       | 53°                                             | -                                | 3                                     |
| Schmoll/2016     | Randomized<br>phase II/NR                      | 120*/61#                            | FOLFOXIRI-<br>bevacizumab                         | -/-                     | -                      | 75 (90/120)                    | 27.9                     | 12                        | 26<br>(31/120)                                  | -                                | 3                                     |

\*, only FOLFOXIRI-Bevacizumab arm considered; FA, folinic acid; °, liver-limited disease only patients; #, median age of both arms; LLD, liver-limited disease; OS, overall survival; PFS, progression-free survival; NOS, Nottingham-Ottawa Scale; NR, not reported; d, day; R0, radical resection; OXA, oxaliplatin; CPT11, irinotecan; FU, 5-Fluorouracil; \*\*, 5-Fluorouracil 200-400 mg/m<sup>2</sup>/2400 bolus/continuous infusion day 1+ oxaliplatin 85 mg/m<sup>2</sup> day 1 + irinotecan 150 mg/m<sup>2</sup> day 1 + bevacizumab 5 mg/kg day 1 every 14 days; FOLFOXIRI + bevacizumab, 5-Fluorouracil 200/3200 mg/m<sup>2</sup> bolus/continuous infusion day 1+ oxaliplatin 85 mg/m<sup>2</sup> day 1 + irinotecan 160 mg/m<sup>2</sup> day 1 + bevacizumab 5 mg/kg day 1 every 14 days;
